# Supplementary material for: High-Throughput Screening of Dipeptide Utilization Mediated by the ABC Transporter DppBCDF and Its Substrate-Binding Proteins DppA1-A5 in Pseudomonas aeruginosa
Source: PubMed Central journal article supplement (PMC4206461; doi:10.1371/journal.pone.0111311), 2014-10-22

# Dataset 2

Reference (red): PA14 wild type  
Experiment (green): DppBCDF mutant

PM6

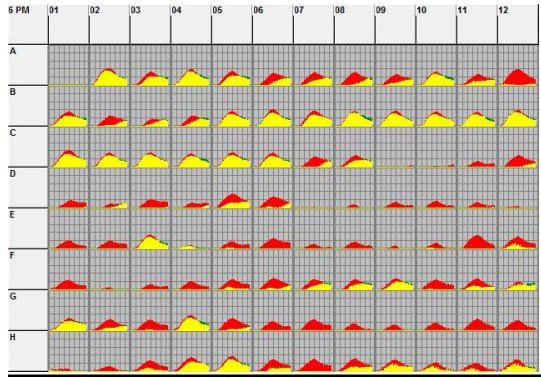

PM7

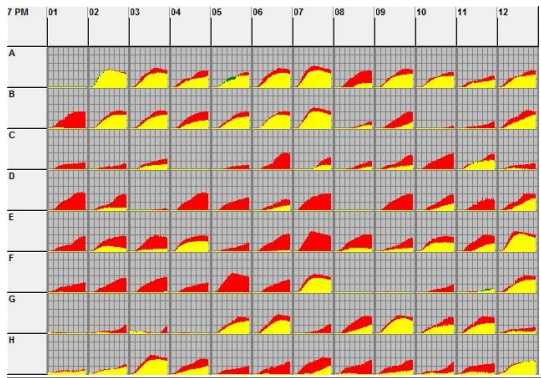

PM8

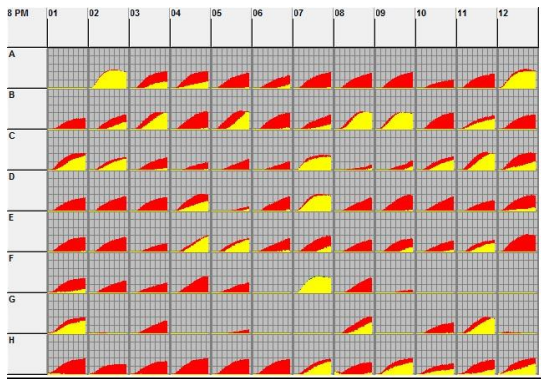

Reference (red): PA14 wild type  
Experiment (green): SBP58 mutant

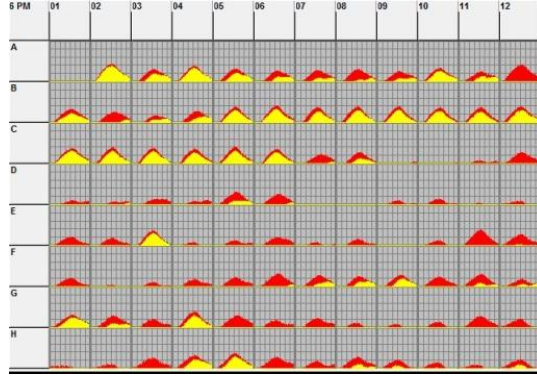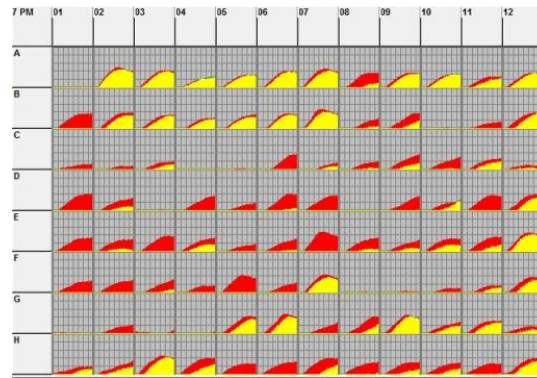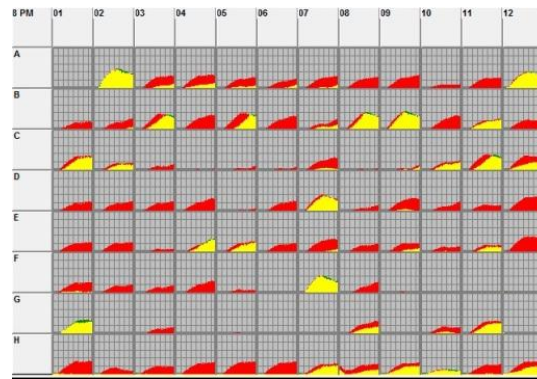

Reference (red): DppBCDF mutant  
Experiment (green): SBP58 mutant

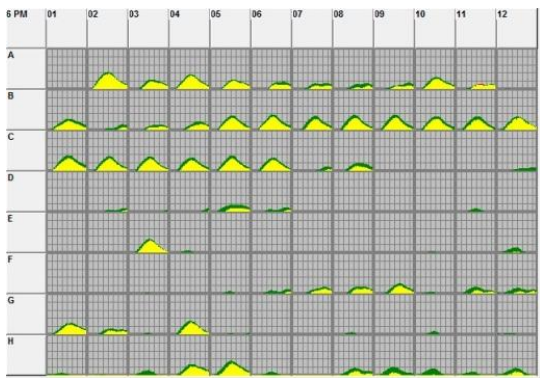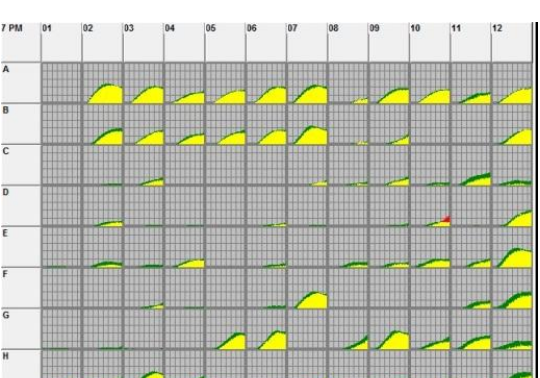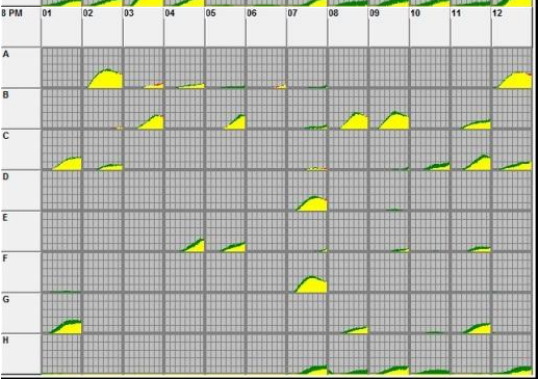

Reference (red):  $\Delta$ SBP58  
Experiment (green):  
 $\Delta$ SBP58-pBBR5.58350

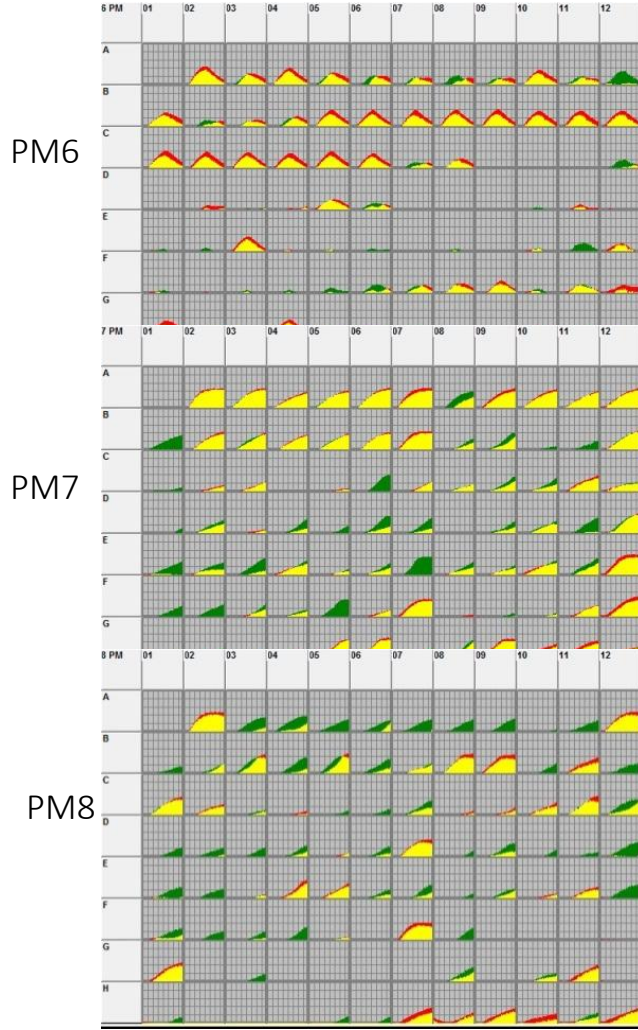

Reference (red):  $\Delta$ SBP58  
Experiment (green):  
 $\Delta$ SBP58-pBBR5.58360

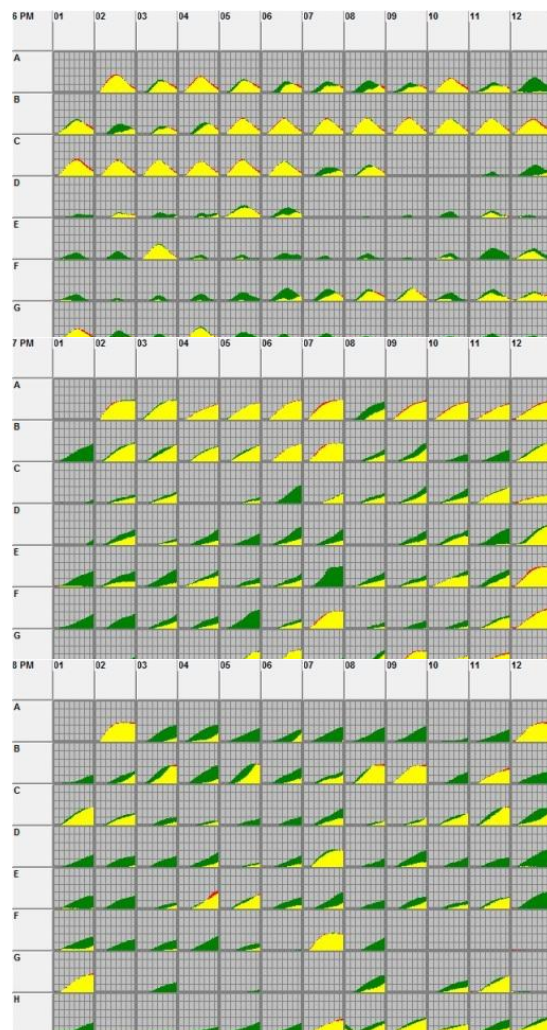

Reference (red):  $\Delta$ SBP58  
Experiment (green):  
 $\Delta$ SBP58-pBBR5.58390

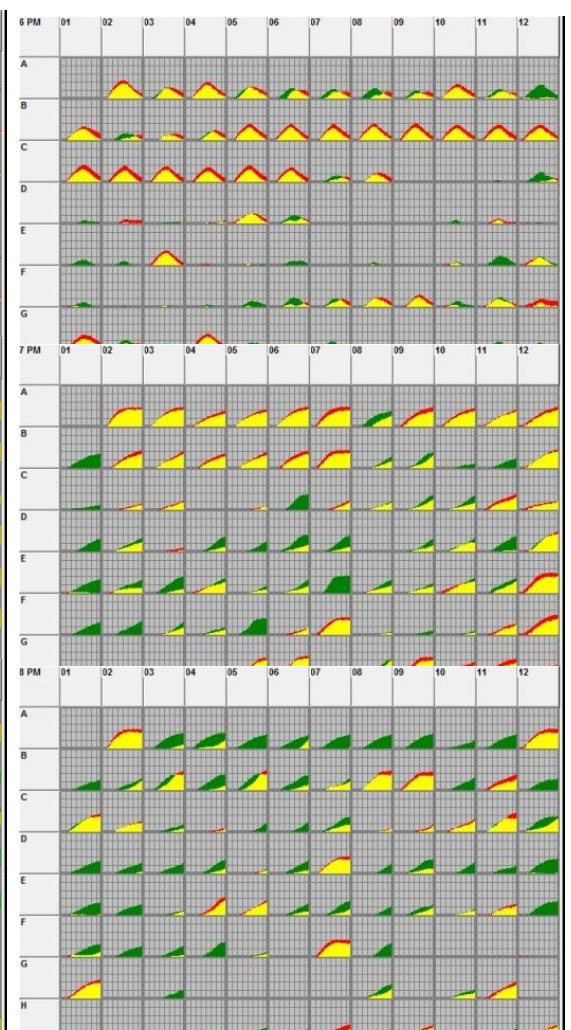

Reference (red):  $\Delta$ SBP58  
Experiment (green):  
 $\Delta$ SBP58-pBBR5.58420

PM6

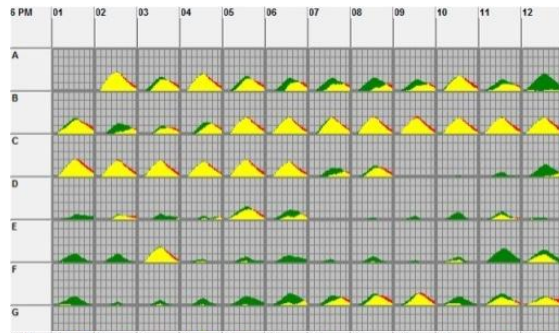

PM7

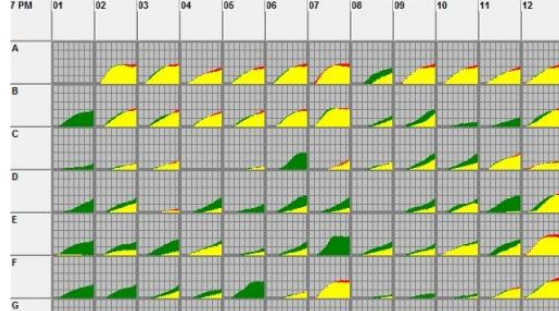

PM8

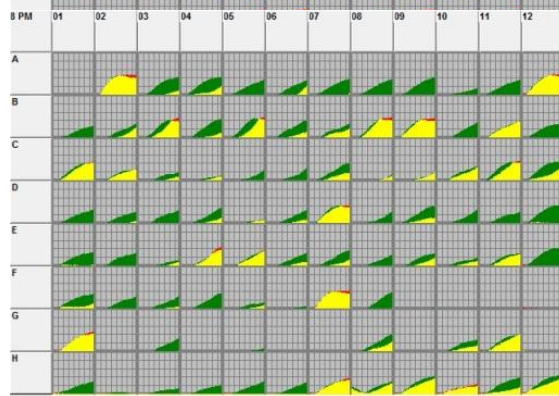

Reference (red):  $\Delta$ SBP58  
Experiment (green):  
 $\Delta$ SBP58-pBBR5.70200

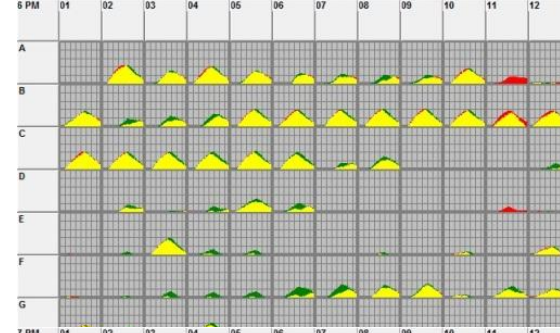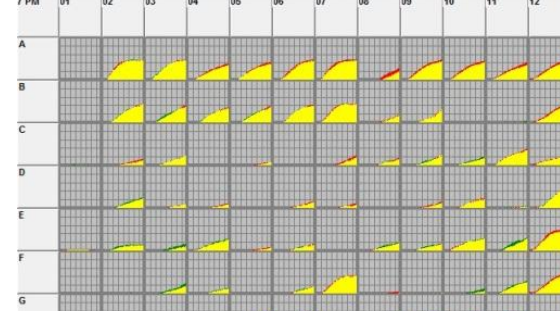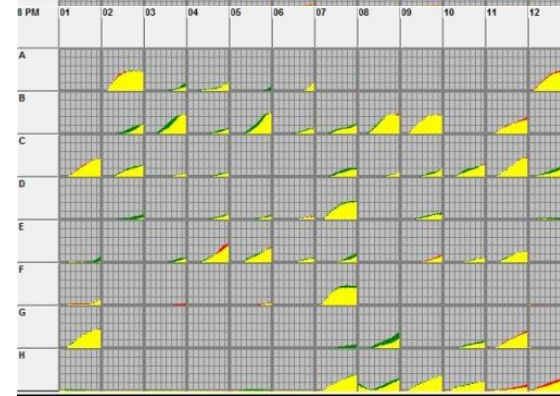

Supplement: pone.0111311.s011.pdf [file pone.0111311.s011.pdf]
