# Supplementary material for: High-Throughput Screening of Dipeptide Utilization Mediated by the ABC Transporter DppBCDF and Its Substrate-Binding Proteins DppA1-A5 in Pseudomonas aeruginosa
Source: PubMed Central journal article supplement (PMC4206461; doi:10.1371/journal.pone.0111311), 2014-10-22
Supplement: pone.0111311.s006.pdf [file pone.0111311.s006.pdf]

**Table S1.** Plasmids used in this study.

| Plasmid                 | Relevant characteristics <sup>a</sup>                                                                                                                                              | Reference or source |
|-------------------------|------------------------------------------------------------------------------------------------------------------------------------------------------------------------------------|---------------------|
| pGEM-T Easy             | Ap <sup>r</sup> , cloning vector                                                                                                                                                   | Promega             |
| pPS858-Eco              | Ap <sup>r</sup> , Gm <sup>r</sup> , source of Gm <sup>r</sup> -GFP- <i>FRT</i> cassette                                                                                            | [67]                |
| pEX18Ap                 | Ap <sup>r</sup> , gene replacement vector                                                                                                                                          | [67]                |
| pEX18Ap.ABC58-ko.Gm-GFP | Ap <sup>r</sup> , Gm <sup>r</sup> , contains a 2.8-kb fusion fragment of PA14_58420, Gm <sup>r</sup> -GFP- <i>FRT</i> cassette, and PA14_58500                                     | This study          |
| pEX18Gm                 | Gm <sup>r</sup> , gene replacement vector                                                                                                                                          | [67]                |
| pEX18Gm.SBP58350-ko     | Gm <sup>r</sup> , contains a 1.1-kb fusion fragment of PA14_58350 and PA14_58360                                                                                                   | This study          |
| pEX18Gm.SBP58390-ko     | Gm <sup>r</sup> , contains a 1.5-kb fusion fragment of PA14_58390                                                                                                                  | This study          |
| pEX18Gm.SBP58420-ko     | Gm <sup>r</sup> , contains a 1.2-kb fusion fragment of PA14_58420                                                                                                                  | This study          |
| pEX18Gm.SBP70200-ko     | Gm <sup>r</sup> , contains a 1.4-kb fusion fragment of PA14_70200                                                                                                                  | This study          |
| pBBR1MCS-5              | Gm <sup>r</sup> , broad-host-range cloning vector                                                                                                                                  | [69]                |
| pBBR5.DppA1             | Gm <sup>r</sup> , contains a 2.0-kb fragment carrying the SBP PA14_58350 including upstream promoter region in opposite orientation with respect to the <i>lac</i> promoter        | This study          |
| pBBR5.DppA2             | Gm <sup>r</sup> , contains a 1.7-kb fragment carrying the SBP PA14_58360 including upstream promoter region in opposite orientation with respect to the <i>lac</i> promoter        | This study          |
| pBBR5.DppA3             | Gm <sup>r</sup> , contains a 1.9-kb fragment carrying the SBP PA14_58390 including upstream promoter region in opposite orientation with respect to the <i>lac</i> promoter        | This study          |
| pBBR5.DppA4             | Gm <sup>r</sup> , contains a 1.8-kb fusion fragment carrying the SBP PA14_58420 including upstream promoter region in opposite orientation with respect to the <i>lac</i> promoter | This study          |
| pBBR5.DppA5             | Gm <sup>r</sup> , contains a 2.0-kb fragment carrying the SBP PA14_70200 including upstream promoter region in opposite orientation with respect to the <i>lac</i> promoter        | This study          |
| pFLP2                   | Ap <sup>r</sup> , source of FLP recombinase                                                                                                                                        | [67]                |

<sup>a</sup> Antibiotic resistance: Ap<sup>r</sup>, ampicillin resistance; Gm<sup>r</sup>, gentamicin resistance
