# Supplementary material for: High-Throughput Screening of Dipeptide Utilization Mediated by the ABC Transporter DppBCDF and Its Substrate-Binding Proteins DppA1-A5 in Pseudomonas aeruginosa
Source: PubMed Central journal article supplement (PMC4206461; doi:10.1371/journal.pone.0111311), 2014-10-22
Supplement: pone.0111311.s007.pdf [file pone.0111311.s007.pdf]

**Table S2.** Primers used in this study.

| Primer                                                            | Sequence (5' - 3')                         | Characteristic(s)                                                                            |
|-------------------------------------------------------------------|--------------------------------------------|----------------------------------------------------------------------------------------------|
| <b>ABC transporter DppBCDF knockout (PA14_58440 – PA14_58490)</b> |                                            |                                                                                              |
| 58420-A1                                                          | TGTCGAAGCAGACCTGG                          | used to clone <i>dppBCDF</i> knockout vector                                                 |
| 58420-A2                                                          | CCCTATAGTGAGTCGGTACCGTTGGCGGGTAACTCCTC     | used to clone <i>dppBCDF</i> knockout vector                                                 |
| 58490-B1                                                          | GGTACCGACTCACTATAGGGGCAATTCTCGGTGAGC       | used to clone <i>dppBCDF</i> knockout vector                                                 |
| 58500-B2                                                          | TGCTGTCCGTACCGCTC                          | used to clone <i>dppBCDF</i> knockout vector                                                 |
| 58420_out1                                                        | ACCCTGCTCGGTACAAC                          | Primer flanking <i>dppBCDF</i> knockout fragment (used to confirm Gm-GFP cassette insertion) |
| 58500_out2                                                        | TTCTGATTGCCCTGGCG                          | Primer flanking <i>dppBCDF</i> knockout fragment (used to confirm Gm-GFP cassette insertion) |
| <b>Substrate-binding protein knockouts</b>                        |                                            |                                                                                              |
| SBP-58350_fwd_Hind                                                | CTAAGCTTGAAGATCACTGGCTGGCG                 | used to clone PA14_58350, PA14_58360 knockout vector                                         |
| SBP-58350_rev                                                     | CCGCGTGGCGCGCAGCGAGGAGTGACCTCTGGTATTTTGA   | used to clone PA14_58350, PA14_58360 knockout vector                                         |
| SBP-58360_fwd                                                     | TCAAAATAACCGAGGTCACTCTCGCTGCGCGCACGCGG     | used to clone PA14_58350, PA14_58360 knockout vector                                         |
| SBP-58360_rev_EcoRI                                               | GCGAATTCTGGGGGATGG                         | used to clone PA14_58350, PA14_58360 knockout vector                                         |
| SBP-58350_out1                                                    | GAAACCACCGCTCCTC                           | Primer flanking PA14_58350, PA14_58360 knockout fragment                                     |
| SBP-58350_out2                                                    | TGAAGGATGGCGACATGG                         | Primer flanking PA14_58350, PA14_58360 knockout fragment                                     |
| SBP-58390_fwd_Hind                                                | ATAAGCTTCTCTCCAGGCG                        | used to clone PA14_58390 knockout vector                                                     |
| SBP-58390_rev                                                     | GACCGGGGCGGCTGCGCAGCAAACCTCATTTTTTTTTTC    | used to clone PA14_58390 knockout vector                                                     |
| SBP-58390_fwd                                                     | GAAAAAGAAAAATGAGGTTTGTGCGCAGCGCCCGCGGTC    | used to clone PA14_58390 knockout vector                                                     |
| SBP-58390_rev_EcoRI                                               | TGAATTCGGTTCGAGGC                          | used to clone PA14_58390 knockout vector                                                     |
| SBP-58390_out1                                                    | TGACCGTAGACCGCATCG                         | Primer flanking PA14_58390 knockout fragment                                                 |
| SBP-58390_out2                                                    | TTGTCCAGCTCTCGCTG                          | Primer flanking PA14_58390 knockout fragment                                                 |
| SBP-58420_fwd_Hind                                                | ATAAGCTTCCGAAGGTGACG                       | used to clone PA14_58420 knockout vector                                                     |
| SBP-58420_rev                                                     | GGCTGTGGTCTTGTCTTGGGGTCTCTCGTGGGG          | used to clone PA14_58420 knockout vector                                                     |
| SBP-58420_fwd                                                     | GCCACGAGGAGGACCCCAAGAACAAGGACCACAGCC       | used to clone PA14_58420 knockout vector                                                     |
| SBP-58420_rev_EcoRI                                               | AGGAATTCGTGCCAGACG                         | used to clone PA14_58420 knockout vector                                                     |
| SBP-58420_out1                                                    | TTCTGGTCAACTCCG                            | Primer flanking PA14_58420 knockout fragment                                                 |
| SBP-58420_out2                                                    | ATGGTCGAACAGCGAACC                         | Primer flanking PA14_58420 knockout fragment                                                 |
| SBP-70200_fwd_Hind                                                | TCAAGCTTGTCTTGTGCGGTGG                     | used to clone PA14_70200 knockout vector                                                     |
| SBP-70200_rev                                                     | GTTCTCCGGGCGTGGCCTGACGGCTCCATTCGAACG       | used to clone PA14_70200 knockout vector                                                     |
| SBP-70200_fwd                                                     | CGTTCGAATGGAGCCGTCAGGCCACGCCGGGAGAAC       | used to clone PA14_70200 knockout vector                                                     |
| SBP-70200_rev_EcoRI                                               | TAGAATTCGATACTGGAGAGCCC                    | used to clone PA14_70200 knockout vector                                                     |
| SBP-70200_out1                                                    | TTCGAAGGTGCCGGATC                          | Primer flanking PA14_70200 knockout fragment                                                 |
| SBP-70200_out2                                                    | TCGTTCTGCGGCCATCTC                         | Primer flanking PA14_70200 knockout fragment                                                 |
| <b>Substrate binding proteins overexpression</b>                  |                                            |                                                                                              |
| SBP+Pro_58350_fwd(SacI)                                           | GAGCTCATGAAGGCCGACGCCAGCTT                 | used to clone PA14_58350 overexpression vector                                               |
| SBP+Pro_58350_rev(ApaI)                                           | GGGCCCTACTTGCCGACGCTGACCT                  | used to clone PA14_58350 overexpression vector                                               |
| SBP+Pro_58360_fwd(SacI)                                           | GAGCTCAAGTAGCTTCGCTGCCAGC                  | used to clone PA14_58360 overexpression vector                                               |
| SBP+Pro_58360_rev(ApaI)                                           | GGGCCCGATCAGTCCAGCTCACCCG                  | used to clone PA14_58360 overexpression vector                                               |
| SBP+Pro_58390_fwd(SacI)                                           | GAGCTCTGTTCGACGACCATCCGACG                 | used to clone PA14_58390 overexpression vector                                               |
| SBP+Pro_58390_rev(ApaI)                                           | GGGCCCTCAGGGCTGGTTGGTTACGC                 | used to clone PA14_58390 overexpression vector                                               |
| SBP+Pro_58420_fwd(XbaI)                                           | TCTAGATAACCAACCAGCCCTGATG                  | used to clone PA14_58420 overexpression vector                                               |
| SBP+Pro_58420_rev                                                 | GAGCAACGGATGGAGCATGGCTGATTGCTCCCTTTATTGTTG | used to clone PA14_58420 overexpression vector                                               |
| SBP-Pro_58420_fwd                                                 | CAACAATAAAGGGAGCAATCAGCCATGCTCCATCCGTTGCTC | used to clone PA14_58420 overexpression vector                                               |
| SBP-Pro_58420_rev(ApaI)                                           | GGGCCCTCAGGGCTTACCCGAGGTG                  | used to clone PA14_58420 overexpression vector                                               |
| SBP+Pro_70200_fwd(SacI)                                           | GAGCTCGGCGGGTTTTGTTGTGTGCG                 | used to clone PA14_70200 overexpression vector                                               |
| SBP+Pro_70200_rev(ApaI)                                           | GGGCCCTCAGCGTTTACCGCGACC                   | used to clone PA14_70200 overexpression vector                                               |

| Primer                     | Sequence (5' - 3')     | Characteristic(s) |
|----------------------------|------------------------|-------------------|
| <b>Quantitative RT-PCR</b> |                        |                   |
| SBP58350_RT_fwd            | GTAGAAACGCCGTCATCCG    |                   |
| SBP58350_RT_rev            | GCGGTTGAAGACGGTTTCC    |                   |
| SBP58360_RT_fwd            | TTCGATCCGGCCCGCTATA    |                   |
| SBP58360_RT_rev            | TGGAATTCACGCCCTGGC     |                   |
| SBP58390_RT_fwd            | GCAACCTGGTGTCTGCTC     |                   |
| SBP58390_RT_rev            | TGTAGGTCTTGCCGTCGTC    |                   |
| SBP58420_RT_fwd            | CGGAAGGCTTCGACATCGT    |                   |
| SBP58420_RT_rev            | GGCGCAGGTGGAAGGTATA    |                   |
| SBP70200_RT_fwd            | AGTGTGTGTACCGAGGCCA    |                   |
| SBP70200_RT_rev            | AAGCGATAGCTCAGGCCGT    |                   |
| rpsL-F                     | GCAAGCGCATGGTCACAAGA   |                   |
| rpsL-R                     | CGCTGTGCTCTTGCAGTTGTGA |                   |
