# Supplementary material for: High-Throughput Screening of Dipeptide Utilization Mediated by the ABC Transporter DppBCDF and Its Substrate-Binding Proteins DppA1-A5 in Pseudomonas aeruginosa
Source: PubMed Central journal article supplement (PMC4206461; doi:10.1371/journal.pone.0111311), 2014-10-22
Supplement: pone.0111311.s008.pdf [file pone.0111311.s008.pdf]

**Table S3.** Identity values of bacterial dipeptide permeases calculated by Clustal Omega.<sup>a</sup>

|          |                                                      | A          | B          | C          | D          | E          | F          | G          | H          | I          |
|----------|------------------------------------------------------|------------|------------|------------|------------|------------|------------|------------|------------|------------|
| <b>A</b> | TppB <i>Escherichia coli</i> (AAC74706)              | <b>100</b> | 14         | 17         | 19         | 17         | 19         | 15         | 18         | 18         |
| <b>B</b> | NikB <i>Escherichia coli</i> (AAC76502)              | 14         | <b>100</b> | 38         | 39         | 40         | 37         | 36         | 39         | 37         |
| <b>C</b> | AccD <i>Agrobacterium tumefaciens</i> (YP_001967616) | 17         | 38         | <b>100</b> | 38         | 41         | 34         | 37         | 39         | 36         |
| <b>D</b> | DdpB <i>Escherichia coli</i> (AAC74559)              | 19         | 39         | 38         | <b>100</b> | 44         | 46         | 42         | 45         | 44         |
| <b>E</b> | GsiC <i>Escherichia coli</i> (AAC73918)              | 17         | 40         | 41         | 44         | <b>100</b> | 41         | 45         | 43         | 46         |
| <b>F</b> | DppB <i>Haemophilus influenzae</i> (P45096)          | 19         | 37         | 34         | 46         | 41         | <b>100</b> | <b>61</b>  | <b>64</b>  | <b>61</b>  |
| <b>G</b> | DppB <i>Escherichia coli</i> (AAC76568)              | 15         | 36         | 37         | 42         | 45         | <b>61</b>  | <b>100</b> | <b>66</b>  | <b>66</b>  |
| <b>H</b> | DppB <i>Burkholderia pseudomallei</i> (YP_106877)    | 18         | 39         | 39         | 45         | 43         | <b>64</b>  | <b>66</b>  | <b>100</b> | <b>74</b>  |
| <b>I</b> | DppB <i>Pseudomonas aeruginosa</i> (ABJ13770)        | 18         | 37         | 36         | 44         | 46         | <b>61</b>  | <b>66</b>  | <b>74</b>  | <b>100</b> |

<sup>a</sup> Bold face numbers indicate an identity of more than 60%.
