# Supplementary material for: High-Throughput Screening of Dipeptide Utilization Mediated by the ABC Transporter DppBCDF and Its Substrate-Binding Proteins DppA1-A5 in Pseudomonas aeruginosa
Source: PubMed Central journal article supplement (PMC4206461; doi:10.1371/journal.pone.0111311), 2014-10-22
Supplement: pone.0111311.s009.pdf [file pone.0111311.s009.pdf]

**Table S4.** Identity values of dipeptide substrate-binding proteins from different Gram-negative bacteria calculated by Clustal Omega.<sup>a</sup>

|          |                                                          | <b>A</b>   | <b>B</b>   | <b>C</b>   | <b>D</b>   | <b>E</b>   | <b>F</b>   | <b>G</b>   | <b>H</b>   | <b>I</b>   | <b>J</b>   | <b>K</b>   | <b>L</b>   | <b>M</b>   | <b>N</b>   |
|----------|----------------------------------------------------------|------------|------------|------------|------------|------------|------------|------------|------------|------------|------------|------------|------------|------------|------------|
| <b>A</b> | NikA <i>Escherichia coli</i> (AAB18451)                  | <b>100</b> | 21         | 24         | 24         | 23         | 24         | 25         | 25         | 24         | 24         | 25         | 26         | 26         | 26         |
| <b>B</b> | DppA5 <i>Pseudomonas aeruginosa</i> (YP_793791)          | 21         | <b>100</b> | <b>64</b>  | <b>64</b>  | 53         | 52         | 41         | 41         | 45         | 44         | 42         | 45         | 44         | 43         |
| <b>C</b> | BDL_1606 <i>Burkholderia pseudomallei</i> (YP_008341763) | 24         | <b>64</b>  | <b>100</b> | <b>99</b>  | 53         | 46         | 47         | 47         | 48         | 45         | 43         | 43         | 42         | 44         |
| <b>D</b> | NikA <i>Burkholderia pseudomallei</i> (WP_004530979)     | 24         | <b>64</b>  | <b>99</b>  | <b>100</b> | 52         | 46         | 47         | 47         | 48         | 45         | 43         | 43         | 42         | 44         |
| <b>E</b> | DppA4 <i>Pseudomonas aeruginosa</i> (YP_792847)          | 23         | 53         | 53         | 52         | <b>100</b> | 59         | 47         | 47         | 49         | 47         | 44         | 49         | 49         | 51         |
| <b>F</b> | DppA2 <i>Pseudomonas aeruginosa</i> (YP_792842)          | 24         | 52         | 46         | 46         | 59         | <b>100</b> | 46         | 46         | 48         | 46         | 41         | 44         | 44         | 47         |
| <b>G</b> | DppA <i>Burkholderia pseudomallei</i> (YP_106876)        | 25         | 41         | 47         | 47         | 47         | 46         | <b>100</b> | <b>100</b> | <b>66</b>  | <b>64</b>  | 45         | 55         | 55         | 51         |
| <b>H</b> | DppA <i>Burkholderia pseudomallei</i> (WP_004534193)     | 25         | 41         | 47         | 47         | 47         | 46         | <b>100</b> | <b>100</b> | <b>66</b>  | <b>64</b>  | 45         | 55         | 55         | 51         |
| <b>I</b> | DppA1 <i>Pseudomonas aeruginosa</i> (YP_792841)          | 24         | 45         | 48         | 48         | 49         | 48         | <b>66</b>  | <b>66</b>  | <b>100</b> | <b>83</b>  | 46         | 51         | 51         | 54         |
| <b>J</b> | DppA3 <i>Pseudomonas aeruginosa</i> (YP_792845)          | 24         | 44         | 45         | 45         | 47         | 46         | <b>64</b>  | <b>64</b>  | <b>83</b>  | <b>100</b> | 46         | 51         | 51         | 52         |
| <b>K</b> | HbpA <i>Haemophilus influenzae</i> (P33950)              | 25         | 42         | 43         | 43         | 44         | 41         | 45         | 45         | 46         | 46         | <b>100</b> | 53         | 53         | 49         |
| <b>L</b> | DppA <i>Escherichia coli</i> (NP_418001)                 | 26         | 45         | 43         | 43         | 49         | 44         | 55         | 55         | 51         | 51         | 53         | <b>100</b> | <b>100</b> | 54         |
| <b>M</b> | DppA <i>Shigella flexneri</i> (NP_709323)                | 26         | 44         | 42         | 42         | 49         | 44         | 55         | 55         | 51         | 51         | 53         | <b>100</b> | <b>100</b> | 54         |
| <b>N</b> | DppA <i>Brucella abortus</i> (WP_006088507)              | 26         | 43         | 44         | 44         | 51         | 47         | 51         | 51         | 54         | 52         | 49         | 54         | 54         | <b>100</b> |

<sup>a</sup> Bold face numbers indicate an identity of more than 60%.
